# Supplementary material for: Heteroleptic manganese compounds as potential precursors for manganese based thin films and nanomaterials
Source: Royal Society of Chemistry journal article supplement (doi:10.1039/d0ra05225f), 2020-01-01
Supplement: d0ra05225f1.pdf [file d0ra05225f1.pdf]

## Supplementary information

### **Heteroleptic Manganese Compounds as Precursor for Manganese Based Thin Films**

Sunju Lee,<sup>a</sup> Ga Yeon Lee,<sup>a</sup> Chang Gyouon Kim,<sup>a,b</sup> Taek-Mo Chung,<sup>\*a,b</sup> and Bo Keun Park<sup>\*a,b</sup>

<sup>a</sup>*Thin Film Materials Research Center, Korea Research Institute of Chemical Technology (KRICT), Daejeon 34114, Republic of Korea*

<sup>b</sup>*Department of Chemical Convergence Materials, University of Science and Technology (UST), 217, Gajeong-Ro, Yuseong-Gu, Daejeon 34113, Republic of Korea*

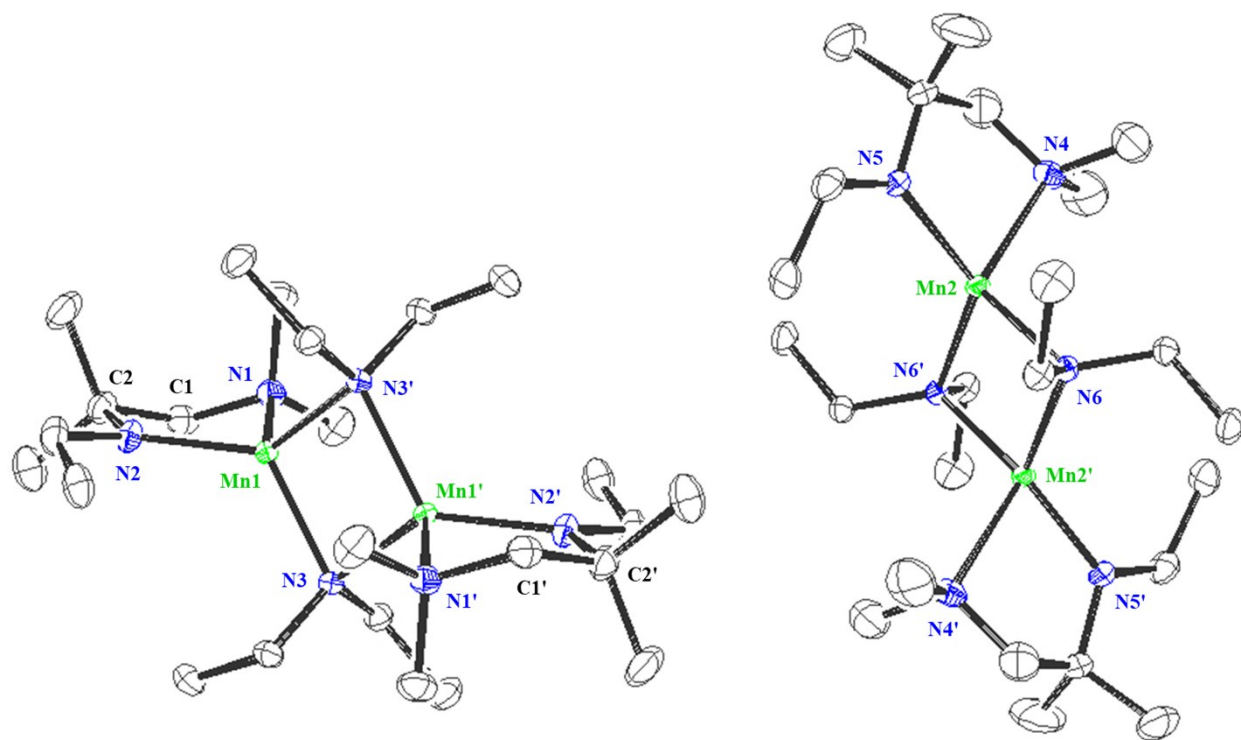

**Fig. S1.** Molecular structure of molecules 1 (left) and 2 (right) in the asymmetric unit of 4. Ellipsoids are set at 50% probability. H atoms omitted for clarity.
